# Supplementary material for: Routinely measured hematological parameters and prediction of recurrent vascular events in patients with clinically manifest vascular disease
Source: PubMed Central journal article supplement (PMC6128486; doi:10.1371/journal.pone.0202682), 2018-09-07
Supplement: pone.0202682.s001.pdf [file pone.0202682.s001.pdf]

## Supporting Information

**Table A:** Associations of hematological parameters with recurrent events

**Table B:** Multivariable associations of SRS variables with recurrent events

**Fig A:** Correlation heat map of hematological parameters

**Fig B:** Unadjusted and CRP-adjusted HRs

**Table A: Associations of hematological parameters with recurrent events**

|                   | Unadjusted        |         | Adjusted for hsCRP |         | Adjusted for SRS variables |         |
|-------------------|-------------------|---------|--------------------|---------|----------------------------|---------|
|                   | HR [95% CI]       | p       | HR [95% CI]        | p       | HR [95% CI]                | p       |
| White blood cells | 1.32 [1.20, 1.45] | <0.0001 | 1.18 [1.07, 1.32]  | 0.0018  | 1.13 [1.00, 1.27]          | 0.044   |
| Neutrophils       | 1.38 [1.25, 1.51] | <0.0001 | 1.25 [1.12, 1.38]  | <0.0001 | 1.18 [1.06, 1.32]          | 0.0031  |
| Lymphocytes       | 0.95 [0.85, 1.07] | 0.39    | 0.92 [0.82, 1.03]  | 0.15    | 0.91 [0.80, 1.03]          | 0.13    |
| Monocytes         | 1.29 [1.17, 1.43] | <0.0001 | 1.18 [1.06, 1.31]  | 0.0026  | 1.09 [0.97, 1.22]          | 0.14    |
| Eosinophils       | 1.13 [1.02, 1.25] | 0.024   | 1.08 [0.97, 1.19]  | 0.17    | 1.01 [0.90, 1.12]          | 0.90    |
| Basophils         | 1.05 [0.95, 1.17] | 0.34    | 1.02 [0.92, 1.14]  | 0.70    | 1.02 [0.91, 1.13]          | 0.75    |
| Neutrophil %      | 1.39 [1.24, 1.56] | <0.0001 | 1.28 [1.14, 1.43]  | <0.0001 | 1.21 [1.08, 1.37]          | 0.0014  |
| Lymphocyte %      | 0.68 [0.61, 0.77] | <0.0001 | 0.75 [0.66, 0.84]  | <0.0001 | 0.80 [0.71, 0.91]          | 0.00048 |
| Monocyte %        | 1.03 [0.92, 1.15] | 0.66    | 1.04 [0.93, 1.16]  | 0.50    | 1.00 [0.89, 1.13]          | 0.98    |
| Eosinophil %      | 1.01 [0.90, 1.13] | 0.82    | 1.02 [0.91, 1.14]  | 0.70    | 0.98 [0.88, 1.10]          | 0.77    |
| Basophil %        | 0.92 [0.83, 1.04] | 0.17    | 0.96 [0.86, 1.08]  | 0.48    | 0.98 [0.88, 1.10]          | 0.79    |
| Red blood cells   | 0.92 [0.82, 1.03] | 0.13    | 0.98 [0.87, 1.09]  | 0.68    | 0.99 [0.88, 1.12]          | 0.89    |
| Hemoglobin        | 0.94 [0.84, 1.05] | 0.28    | 1.03 [0.92, 1.15]  | 0.66    | 1.01 [0.89, 1.14]          | 0.88    |
| MCV               | 1.08 [0.97, 1.21] | 0.17    | 1.09 [0.98, 1.21]  | 0.13    | 1.04 [0.93, 1.16]          | 0.53    |
| RDW               | 1.30 [1.19, 1.42] | <0.0001 | 1.21 [1.10, 1.33]  | 0.00011 | 1.16 [1.05, 1.28]          | 0.0039  |
| MCH               | 1.04 [0.93, 1.16] | 0.53    | 1.06 [0.95, 1.19]  | 0.26    | 1.01 [0.90, 1.13]          | 0.84    |
| MCHC              | 0.94 [0.84, 1.05] | 0.26    | 0.98 [0.88, 1.10]  | 0.74    | 0.96 [0.86, 1.08]          | 0.49    |
| Hematocrit*       |                   |         |                    |         |                            |         |
| linear term       | 1.01 [0.91, 1.12] | 0.88    | 1.07 [0.97, 1.19]  | 0.19    | 1.05 [0.94, 1.18]          | 0.38    |
| quadratic term    | 1.13 [1.06, 1.22] | 0.00032 | 1.11 [1.00, 1.01]  | 0.0027  | 1.09 [1.02, 1.18]          | 0.014   |
| Platelets         | 0.99 [0.89, 1.11] | 0.89    | 0.90 [0.80, 1.01]  | 0.064   | 0.96 [0.85, 1.09]          | 0.56    |
| MPV               | 1.12 [1.01, 1.25] | 0.04    | 1.12 [1.00, 1.24]  | 0.049   | 1.10 [0.98, 1.23]          | 0.10    |
| Plateletcrit      | 1.03 [0.92, 1.15] | 0.57    | 0.93 [0.83, 1.04]  | 0.22    | 1.01 [0.89, 1.13]          | 0.93    |
| PDW               | 1.05 [0.94, 1.18] | 0.38    | 1.07 [0.95, 1.19]  | 0.27    | 1.02 [0.91, 1.15]          | 0.71    |

**Table A:** Each of the 22 hematological parameters was analyzed separately. HRs for recurrent vascular events are shown unadjusted, adjusted for  $\log_e(\text{hs-CRP})$  and adjusted for all SRS variables. HRs are given per SD-unit increase. CI: confidence interval; HR: hazard ratio; hs-CRP: high-sensitive C-reactive protein; MCH: mean corpuscular hemoglobin; MCHC: mean corpuscular hemoglobin concentration; MCV: mean corpuscular volume; MPV: mean platelet volume; PDW: platelet distribution width; RDW: red cell distribution width; SD: standard deviation; SRS: SMART risk score.

\* A quadratic term was added for hematocrit. Significance test for quadratic polynomial after adjustment for all SRS variables:  $\chi^2(\text{df}=2)=6.2$ ;  $p=0.045$ .

**Table B: Multivariable associations of SRS variables with recurrent events**

|                                                   | HR [95% CI]       | df | $\chi^2$ | p       |
|---------------------------------------------------|-------------------|----|----------|---------|
| Age*                                              | -                 | 2  | 10.11    | 0.0064  |
| Sex, male                                         | 1.43 [1.07, 1.92] | 1  | 5.81     | 0.016   |
| History of                                        | -                 |    |          |         |
| cerebrovascular disease                           | 1.40 [1.02, 1.92] | 1  | 4.29     | 0.038   |
| coronary artery disease                           | 1.16 [0.82, 1.64] | 1  | 0.68     | 0.41    |
| abdominal aortic aneurysm                         | 1.05 [0.67, 1.64] | 1  | 0.04     | 0.84    |
| peripheral artery disease                         | 1.06 [0.75, 1.49] | 1  | 0.09     | 0.76    |
| Time since first vascular event, 10 years         | 1.22 [1.04, 1.44] | 1  | 5.98     | 0.015   |
| Current smoking                                   | 1.70 [1.32, 2.19] | 1  | 17.04    | <0.0001 |
| Diabetes mellitus                                 | 1.26 [0.96, 1.65] | 1  | 2.76     | 0.097   |
| Systolic blood pressure, 10 mm Hg                 | 1.05 [0.99, 1.11] | 1  | 2.23     | 0.14    |
| eGFR*                                             | -                 | 2  | 18.39    | 0.00010 |
| Total cholesterol, mmol/l                         | 1.06 [0.94, 1.18] | 1  | 0.93     | 0.33    |
| HDL cholesterol, mmol/l                           | 0.84 [0.58, 1.22] | 1  | 0.84     | 0.36    |
| log <sub>e</sub> [CRP], log <sub>e</sub> [nmol/l] | 1.35 [1.22, 1.49] | 1  | 32.93    | <0.0001 |

**Table B:** HRs are given per unit increase. The SRS variables were used to construct a reference model to assess the incremental predictive value of hematological parameters. CI: confidence interval; HR: hazard ratio; eGFR: estimated glomerular filtration rate; HDL: high-density lipoprotein; hs-CRP: high-sensitivity C-reactive protein; LDL: low-density lipoprotein; SD: standard deviation; SRS: SMART risk score.

\* A quadratic term was added for age and eGFR. For these variables, df,  $\chi^2$  and p refer to the quadratic polynomial.

**Fig A: Correlation heat map of hematological parameters**

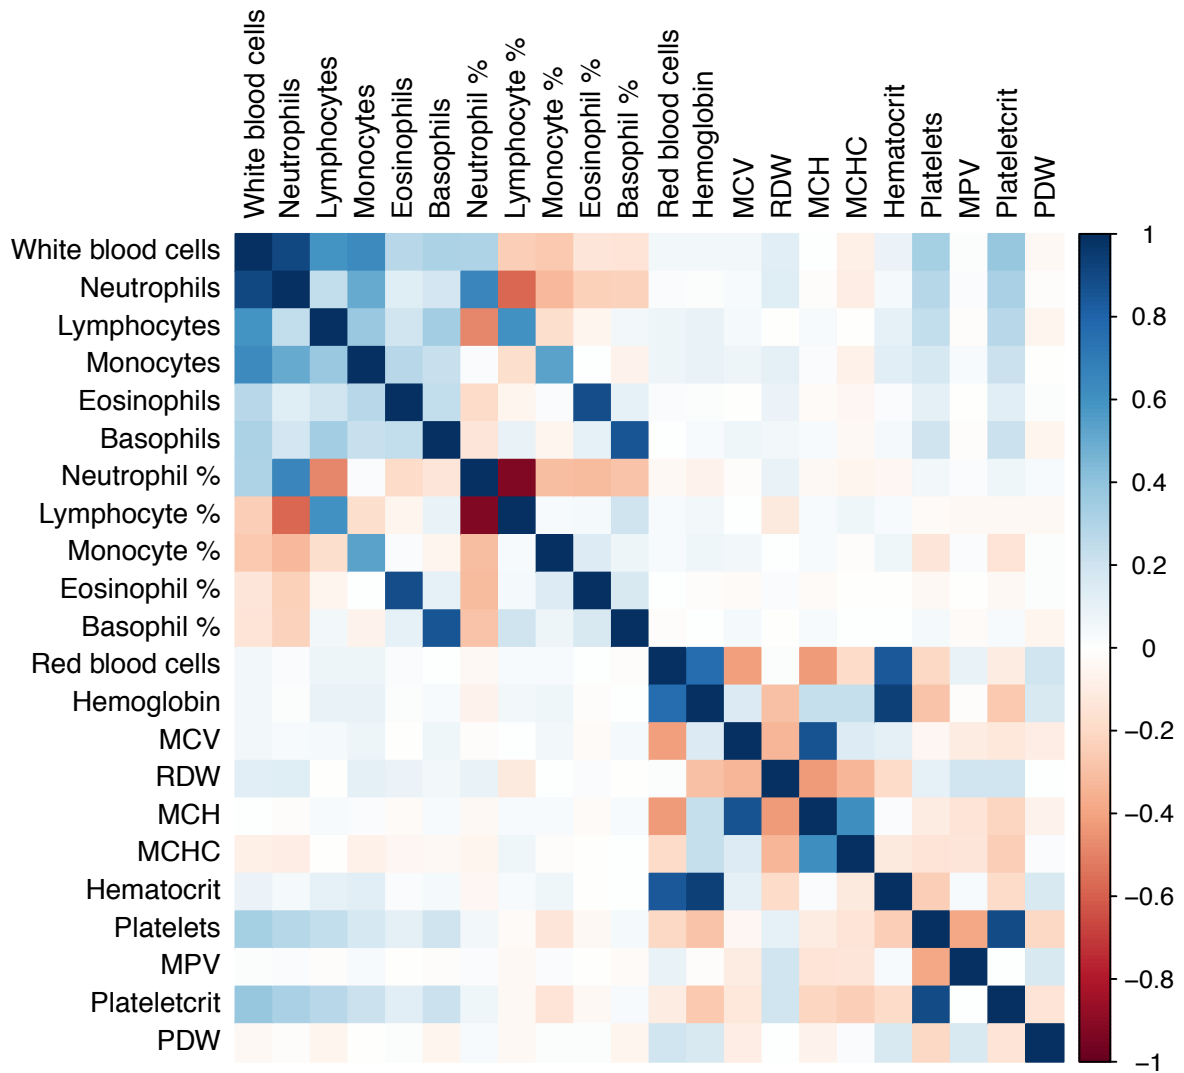

**Fig A:** Correlation heat map of hematological parameters, Correlations were assessed Pearson's correlation coefficient. MCH: mean corpuscular hemoglobin; MCHC: mean corpuscular hemoglobin concentration; MCV: mean corpuscular volume; MPV: mean platelet volume; PDW: platelet distribution width; RDW: red cell distribution width.

**Fig B: Unadjusted and CRP-adjusted HRs**

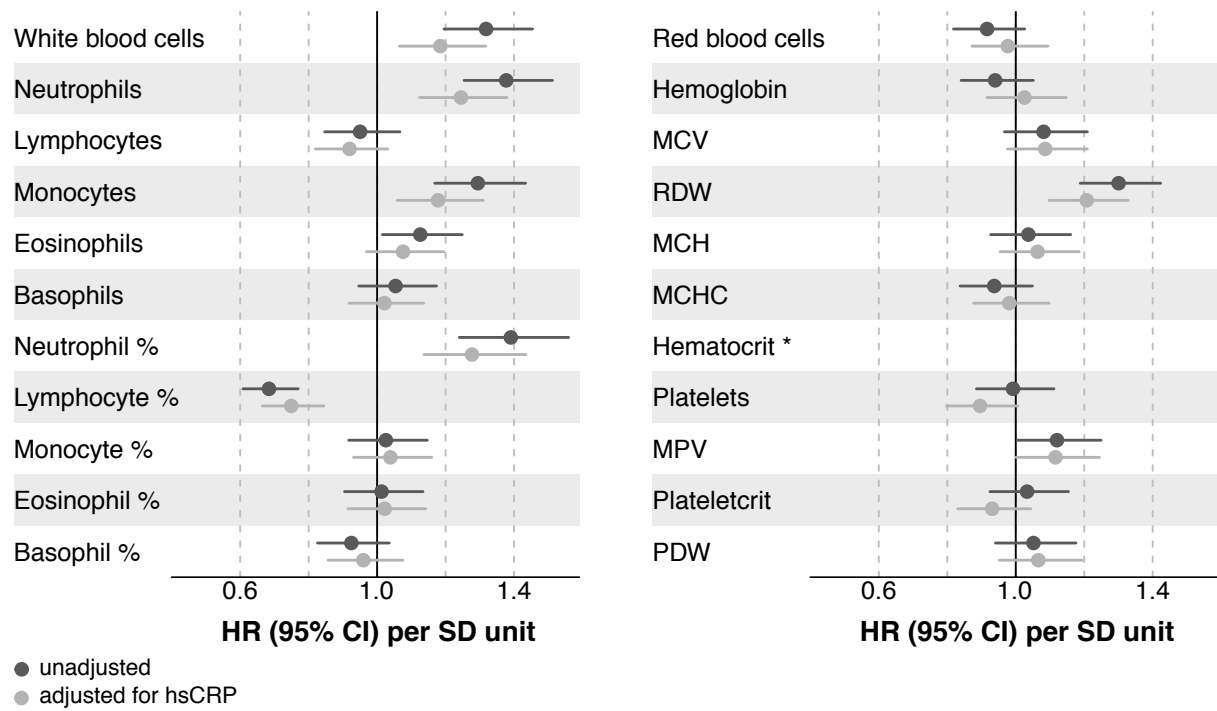

**Fig B:** HRs for recurrent vascular events are shown unadjusted and adjusted for  $\log_e(\text{hs-CRP})$ . HRs are given in given per SD-unit increase. CI: confidence interval; HR: hazard ratio; MCH: mean corpuscular hemoglobin; MCHC: mean corpuscular hemoglobin concentration; MCV: mean corpuscular volume; MPV: mean platelet volume; PDW: platelet distribution width; RDW: red cell distribution width; SD: standard deviation.

\* A quadratic term was added for hematocrit.
